# Supplementary material for: 2′-Fucosyllactose Supplementation Improves Gut-Brain Signaling and Diet-Induced Obese Phenotype and Changes the Gut Microbiota in High Fat-Fed Mice
Source: MDPI journal article supplement (doi:10.3390/nu12041003), 2020-04-05
Supplement: s1 [file s1]

| Weeks                   | -1          | 1                                                         | 2 | 3 | 4 | 5   | 6    |
|-------------------------|-------------|-----------------------------------------------------------|---|---|---|-----|------|
| <b>LF</b>               | Acclimation | LF diet                                                   |   |   |   |     |      |
| <b>HF</b>               |             | HF diet                                                   |   |   |   |     |      |
| <b>HF_2'-FL</b>         |             | HF diet with HF_2'-FL (1, 2, 5, or 10%) in drinking water |   |   |   |     |      |
| <b>Major procedures</b> |             |                                                           |   |   |   | CCK | OGTT |

**Figure S1.** Experimental design of the study. After 1-week acclimation, 36 male C57/BL6 mice (n = 6/group; 6 week old) were split into six weight-matched groups and fed ad libitum either a low-fat (LF; 10% kcal as fat; Research Diets D12450J), high-fat (HF; 45% kcal as fat; Research Diets D08091803B), or HF diet with 2'-FL (HF\_2'-FL; with 2'-FL provided by BASF, Germany) at 1, 2, 5, or 10% (w/v) in drinking water for 6 weeks. CCK, cholecystokinin sensitivity test; HF, high fat; HF\_x% 2'-FL, HF with x% 2'-FL (w/v) in drinking water; LF, low fat; OGTT, oral glucose tolerance test; 2'-FL, 2-fucosyllactose.

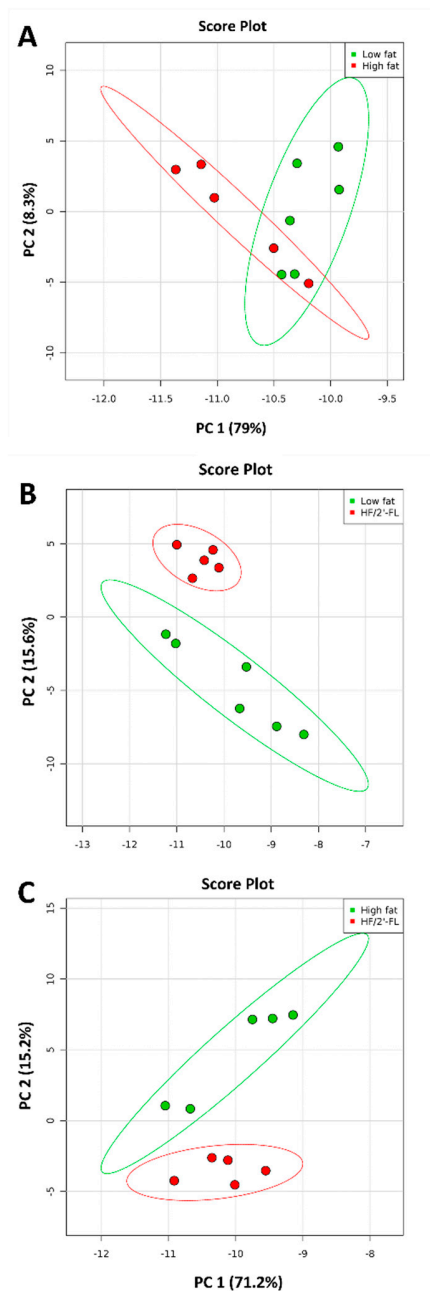

**Figure S2.** Effect of 10% 2'-FL supplementation on the composition of the gut microbiota. Principal components analysis on all taxonomic levels of mice fed an LF, HF, or HF/2'-FL diet for 6 weeks; between LF and HF (A), LF and 10% 2'-FL (B), and HF and 10% 2'-FL (C). The METAGENassist platform was used for multivariate statistical analysis.  $n = 5\sim6/\text{group}$ . HF, high fat; HF/2'-FL, HF with 10% 2'-FL (w/v) in drinking water; low fat; 2'-FL, 2-fucosyllactose.

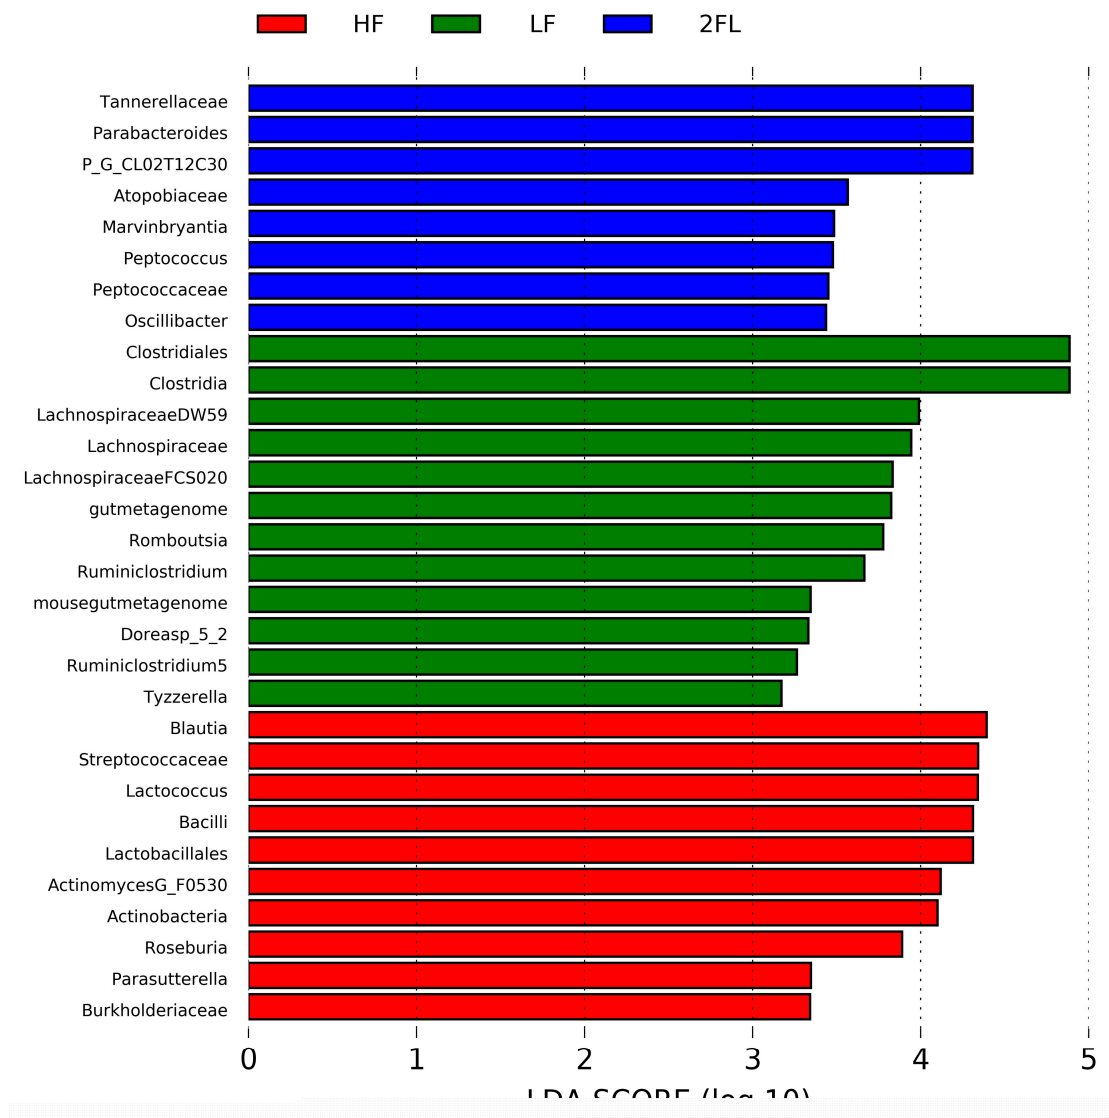

**Figure S3.** Histogram of the LDA scores from LEfSe analysis, showing the most differentially abundant taxa at all taxonomic levels enriched in microbiota from mice fed an LF, HF, or 2FL (in drinking water, w/v) diet for 6 weeks.  $n = 5\sim6/\text{group}$ . The LEfSe method was used to identify taxa that were significantly differentially abundant for each group. Differences in abundances among groups were assessed using Kruskal–Wallis test with Dunn’s post hoc test. The threshold of the logarithmic linear discriminant analysis score was 4.0. HF, high fat; 2FL, HF with 10% 2’-FL (w/v) in drinking water; LEfSe, linear discriminant analysis effect size; LF, low fat; P\_G\_, *Parabacteroides goldsteinii*.

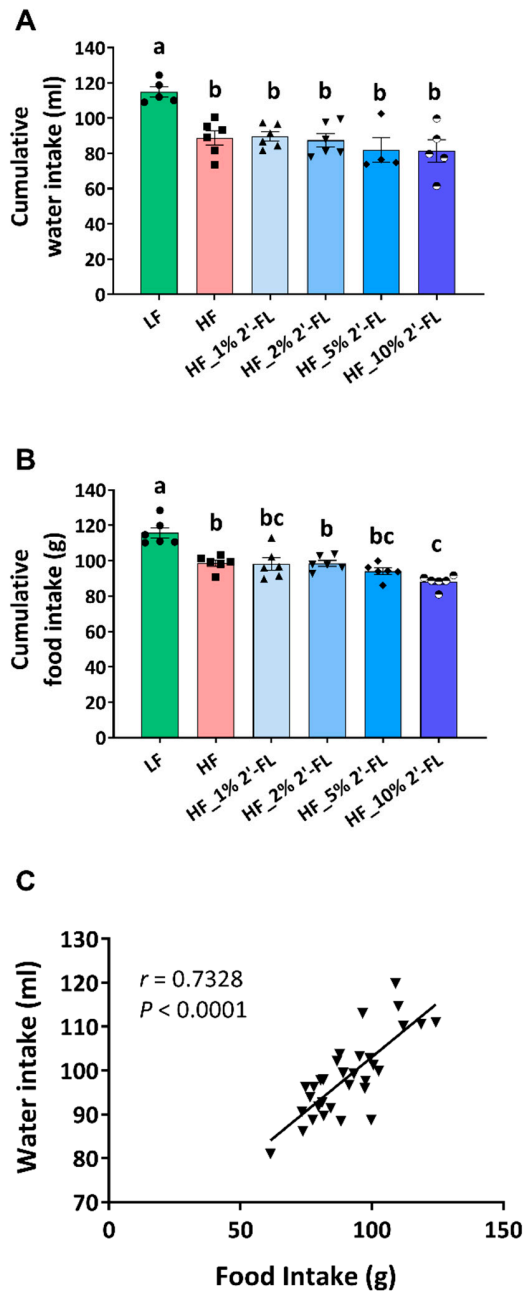

**Figure S4.** Water intake. Cumulative water (A) and food (B) consumption and the correlation between water and food intake (C) in mice fed an HF\_2'-FL (1, 2, 5, or 10% (w/v) in drinking water) diet for 6 wk. One-factor ANOVA was performed for statistical analysis. Differences between groups were analyzed by using Tukey's post hoc tests. Correlation water and food intakes was determined by using the parametric Pearson correlation analysis. Values are means  $\pm$  SEMs,  $n = 6$ /group. Labeled means at a time without a common letter differ,  $P < 0.05$ . HF\_x% 2'-FL, HF with x% 2'-FL (w/v) in drinking water; 2'-FL, 2-fucosyllactose.

**Table S1.** Diet composition of LF and HF diets<sup>1</sup>

| Diet Ingredient                 | LF - D12450J |      | HF - D08091803B |      |
|---------------------------------|--------------|------|-----------------|------|
|                                 | g            | kcal | g               | kcal |
| Casein                          | 200          | 800  | 200             | 800  |
| L-Cystine                       | 3            | 12   | 3               | 12   |
| Corn Starch                     | 401.29       | 2025 | 176.8           | 707  |
| Maltodextrin 10                 | 125          | 500  | 100             | 400  |
| Sucrose                         | 68.8         | 275  | 68.8            | 275  |
| Cellulose (Solka floc, 200 FCC) | 50           | 0    | 50              | 0    |
| Soybean Oil                     | 25           | 225  | 25              | 225  |
| Lard                            | 20           | 180  | 177.5           | 1598 |
| Mineral Mix S10026              | 10           | 0    | 10              | 0    |
| Dicalcium Phosphate             | 13           | 0    | 13              | 0    |
| Calcium Carbonate               | 5.5          | 0    | 5.5             | 0    |
| Potassium Citrate, 1 H2O        | 16.5         | 0    | 16.5            | 0    |
| Vitamin Mix V10001              | 10           | 40   | 10              | 40   |
| Choline Bitartrate              | 2            | 0    | 2               | 0    |
| FD&C Yellow Dye #5              | 0.04         | 0    | 0               | 0    |
| FD&C Red Dye #40                | 0            | 0    | 0               | 0    |
| FD&C Blue Dye #1                | 0.01         | 0    | 0.05            | 0    |
| Total                           | 1055.05      | 4057 | 858.13          | 4057 |
| Protein, % kcal                 |              | 20   |                 | 20   |
| Fat, % kcal                     |              | 10   |                 | 45   |
| Carbohydrates, % kcal           |              | 70   |                 | 35   |
| Energy, kcal/g                  |              | 3.82 |                 | 4.7  |

<sup>1</sup> Diets prepared by Research Diets, Inc. HF, high-fat; LF, low-fat

**Table S2.** Primer sequences used for RT-PCR

| Gene                           | Accession no.  | Forward primers (5' to 3') | Reverse primers (5' to 3') |
|--------------------------------|----------------|----------------------------|----------------------------|
| <b>GAPDH</b>                   | NM_008084.3    | ACGGTCAGGTCATCACTATC       | GATGCCACAGGATTCCATAC       |
| <b>IL-1<math>\beta</math></b>  | NM_008361.4    | ACAGATCGGCTCCTACTT         | CGGGTCTGCTCATAGTAATG       |
| <b>IL-6</b>                    | NM_001314054.1 | AAACAGTCCAGGCTTCTC         | ATGGCTGGGAACCATTAG         |
| <b>MCP-1</b>                   | NM_011333.3    | CGATGTCTAAGAGAGAAAGGG      | GGAAACAGGTACCCACAAA        |
| <b>PPAR<math>\gamma</math></b> | NM_011146.3    | GAGCATCTCCCTCACAATTC       | GGGTGCAGCGAACTTTAT         |

GAPDH, glyceraldehyde 3-phosphate dehydrogenase; IL-1 $\beta$ , interleukin-1 beta; IL-6, interleukin-6; MCP-1, monocyte chemoattractant protein-1; PPAR $\gamma$ , peroxisome proliferator-activated receptor gamma.

Table S3. ANOVA data summary

|                                     | <b>F(DFn, DFd)</b>                            | <b>P value</b> |
|-------------------------------------|-----------------------------------------------|----------------|
| <b>Two-way ANOVA of body weight</b> |                                               |                |
| Interaction                         | F (30, 180) = 4.927                           | P<0.0001       |
| Diet                                | F (5, 30) = 3.691                             | P=0.0101       |
| Time                                | F (6, 180) = 258.4                            | P<0.0001       |
| <b>Two-way ANOVA of fat mass</b>    |                                               |                |
| Interaction                         | F (5, 30) = 3.889                             | P=0.0078       |
| Diet                                | F (5, 30) = 8.018                             | P<0.0001       |
| Time                                | F (1, 30) = 84.02                             | P<0.0001       |
| <b>Two-way ANOVA of lean mass</b>   |                                               |                |
| Interaction                         | F (5, 30) = 0.4699                            | P=0.7956       |
| Diet                                | F (5, 30) = 0.1447                            | P=0.9801       |
| Time                                | F (1, 30) = 19.94                             | P=0.0001       |
| <b>One-way ANOVA (factor: diet)</b> |                                               |                |
| Cumulative energy intake            | F (5, 30) = 3.445                             | P=0.0141       |
| Feed efficiency                     | F (5, 30) = 6.703                             | P=0.0003       |
| c-Fos positive cells in the NTS     | F (2, 13) = 2.131                             | P=0.1584       |
| c-Fos positive cells in the AP      | F (2, 13) = 1.291                             | P=0.3079       |
| Cecal acetic acid level             | F (2, 14) = 1.359                             | P=0.2887       |
| Cecal butyric acid level            | F (2, 14) = 4.593                             | P=0.0293       |
| Cecal citric acid                   | F (2, 15) = 0.4953                            | P=0.6190       |
| Cecal formic acid                   | F (2, 14) = 2.006                             | P=0.1714       |
| Cecal glyceric acid                 | F (2, 15) = 6.461                             | P=0.0095       |
| Cecal glycolic acid                 | F (2, 15) = 0.3647                            | P=0.7004       |
| Cecal hexanoic acid                 | F (2, 14) = 0.4263                            | P=0.6611       |
| Cecal isobutyric Acid               | F (2, 15) = 1.917                             | P=0.1815       |
| Cecal isovaleric Acid               | F (2, 14) = 0.4263                            | P=0.6611       |
| Cecal lactic acid                   | F (2, 14) = 7.456                             | P=0.0062       |
| Cecal propionic acid                | F (2, 14) = 0.1683                            | P=0.8468       |
| Cecal pyruvic acid                  | F (2, 15) = 4.834                             | P=0.0240       |
| Cecal succinic acid                 | F (2, 15) = 1.506                             | P=0.2535       |
| Cecal valeric acid                  | F (2, 15) = 1.234                             | P=0.3192       |
| Cecal indole-3-acetic acid          | F (2, 15) = 1.234                             | P=0.3192       |
| Cecal indole-3-butyric acid         | The samples all had a standard error of zero. |                |
| Cecal indole-3-lactic acid          | Not detected                                  |                |
| Cecal indole-3-propionic acid       | F (2, 14) = 0.1647                            | P=0.8498       |
| Cecal serotonin level               | F (2, 15) = 14.65                             | P=0.0003       |
| Cecal IL-1 $\beta$ mRNA             | F (2, 14) = 4.261                             | P=0.0359       |
| Cecal IL-6 mRNA                     | F (2, 14) = 3.465                             | P=0.0599       |
| MCP-1 mRNA in WAT                   | F (2, 15) = 5.299                             | P=0.0182       |
| White adipocyte size                | F (2, 11) = 10.33                             | P=0.0030       |
| Plasma LBP level                    | F (2, 14) = 6.733                             | P=0.0089       |

|                                |                    |          |
|--------------------------------|--------------------|----------|
| Plasma Lcn-2 level             | F (2, 13) = 2.751  | P=0.1009 |
| ORO-positive area in the liver | F (2, 14) = 0.3141 | P=0.7355 |
| Hepatic TG level               | F (2, 15) = 1.463  | P=0.2628 |
| Hepatic PPAR $\gamma$ mRNA     | F (2, 15) = 6.815  | P=0.0078 |
| Cumulative food intake (g)     | F (5, 30) = 15.72  | P<0.0001 |
| Cumulative water intake (g)    | F (5, 26) = 7.315  | P=0.0002 |

---

Differences between groups were analyzed by using Tukey's post hoc tests. Differences were considered significant if  $P < 0.05$ . AP, area postrema; IL-1 $\beta$ , interleukin 1 beta; IL-6, interleukin 6, LBP, lipopolysaccharide (LPS)-binding protein; Lcn-2; lipocalin-2; MCP-1; monocyte chemoattractant protein-1; NTS, nucleus of the solitary tract; ORO, Oil Red O; PPAR $\gamma$ , peroxisome proliferator-activated receptor gamma; TG, triglyceride; WAT, white adipose tissue.
